# Supplementary material for: Developing a Prognostic Micro-RNA Signature for Human Cervical Carcinoma
Source: PubMed Central journal article supplement (PMC4399941; doi:10.1371/journal.pone.0123946), 2015-04-16
Supplement: pone.0123946.s003.pdf [file pone.0123946.s003.pdf]

**S3 Table. Significantly differentially-expressed miRNAs in cervical cancer**

| <b>miRNA</b> | <b>Fold Change (log<sub>2</sub>)</b> | <b>P-value</b>          |
|--------------|--------------------------------------|-------------------------|
| miR-149      | -4.30                                | 2.09 x 10 <sup>-9</sup> |
| let-7c       | -3.42                                | 5.69 x 10 <sup>-7</sup> |
| miR-218      | -3.79                                | 5.14 x 10 <sup>-6</sup> |
| miR-139-5p   | -2.75                                | 1.44 x 10 <sup>-5</sup> |
| miR-203      | -3.43                                | 1.44 x 10 <sup>-5</sup> |
| miR-125b     | -2.80                                | 1.44 x 10 <sup>-5</sup> |
| miR-376c     | -3.08                                | 4.77 x 10 <sup>-5</sup> |
| miR-361-5p   | -3.76                                | 1.15 x 10 <sup>-4</sup> |
| miR-320a     | -1.07                                | 1.33 x 10 <sup>-4</sup> |
| miR-324-3p   | -1.85                                | 1.67 x 10 <sup>-4</sup> |
| miR-196b     | -1.59                                | 2.07 x 10 <sup>-4</sup> |
| let-7b       | -1.48                                | 4.24 x 10 <sup>-4</sup> |
| let-7a       | -1.84                                | 4.24 x 10 <sup>-4</sup> |
| miR-100      | -2.61                                | 4.24 x 10 <sup>-4</sup> |
| let-7e       | -1.29                                | 1.16 x 10 <sup>-3</sup> |
| miR-193b     | -1.14                                | 1.23 x 10 <sup>-3</sup> |
| miR-99a      | -2.86                                | 1.32 x 10 <sup>-3</sup> |
| miR-328      | -1.84                                | 1.35 x 10 <sup>-3</sup> |
| miR-195      | -1.82                                | 1.35 x 10 <sup>-3</sup> |
| miR-21       | 1.89                                 | 1.35 x 10 <sup>-3</sup> |
| miR-24       | -1.10                                | 1.43 x 10 <sup>-3</sup> |
| miR-574-3p   | -1.57                                | 2.40 x 10 <sup>-3</sup> |
| miR-375      | -5.72                                | 2.43 x 10 <sup>-3</sup> |
| miR-148a     | -2.22                                | 2.43 x 10 <sup>-3</sup> |
| miR-29a      | -1.51                                | 2.70 x 10 <sup>-3</sup> |
| let-7g       | -0.91                                | 6.46 x 10 <sup>-3</sup> |
| miR-210      | -1.70                                | 6.80 x 10 <sup>-3</sup> |
| miR-455-5p   | -2.26                                | 8.50 x 10 <sup>-3</sup> |
| miR-187      | 2.85                                 | 8.70 x 10 <sup>-3</sup> |
