# Supplementary material for: Developing a Prognostic Micro-RNA Signature for Human Cervical Carcinoma
Source: PubMed Central journal article supplement (PMC4399941; doi:10.1371/journal.pone.0123946), 2015-04-16

**FIGURE S2**

**A**

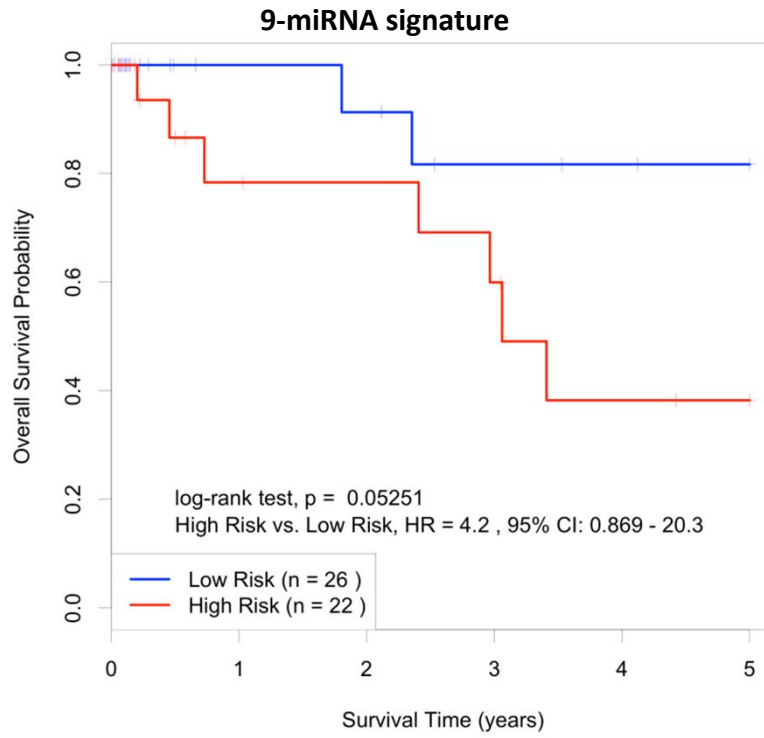

**B**

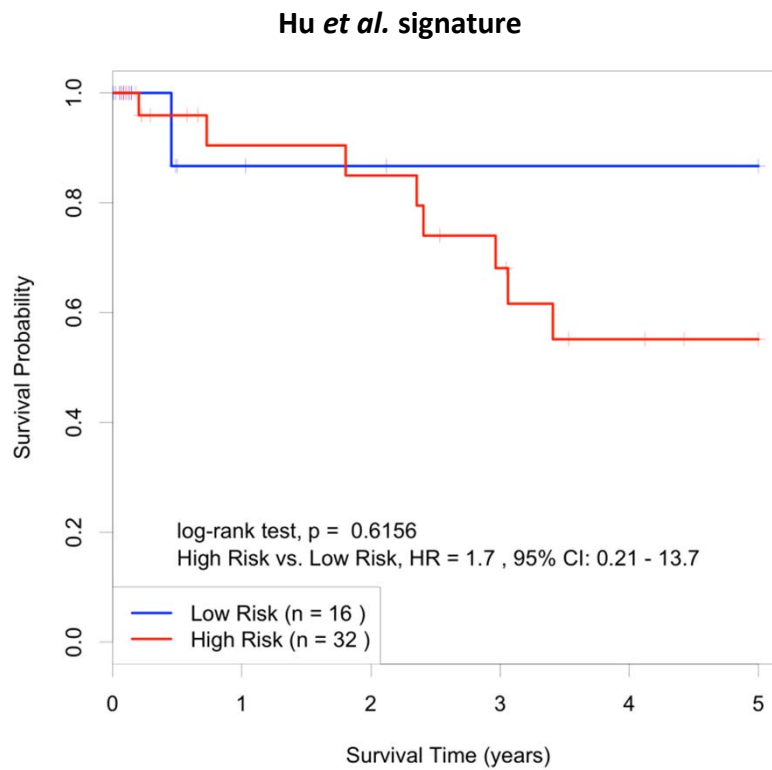

Supplement: pone.0123946.s009.pdf [file pone.0123946.s009.pdf]
